# Supplementary material for: Causal relationship between immune cells and pulmonary arterial hypertension: Mendelian randomization analysis
Source: PubMed Central journal article supplement (PMC11404942; doi:10.1097/md.0000000000039670), 2024-09-13
Supplement: medi-103-e39670-s002.pdf [file medi-103-e39670-s002.pdf]

Supplement figure 1. The scatter plot of Immunocyte on PAH in positively effect

Supplement figure 2. The scatter plot of Immunocyte on PAH in negatively effect

Supplement figure 3. The funnel plot of Immunocyte on PAH in positively effect

Supplement figure 4. The funnel plot of Immunocyte on PAH in negatively effect

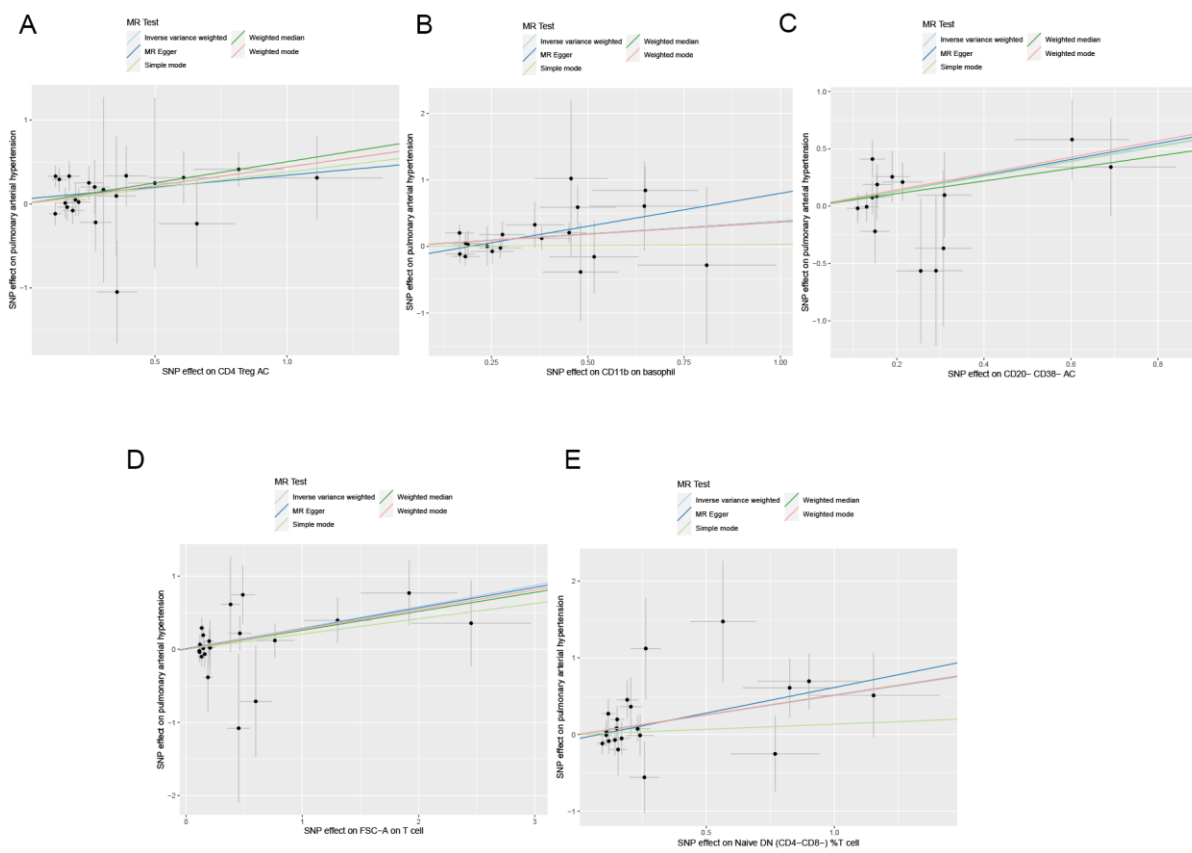

**A**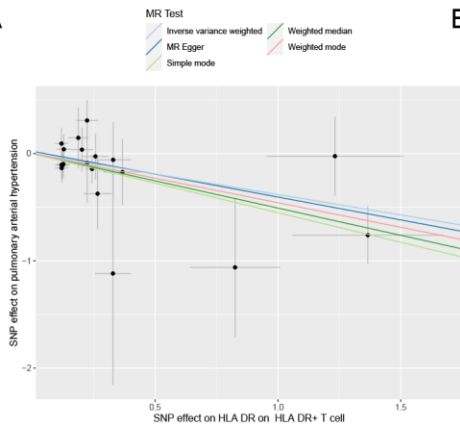**B**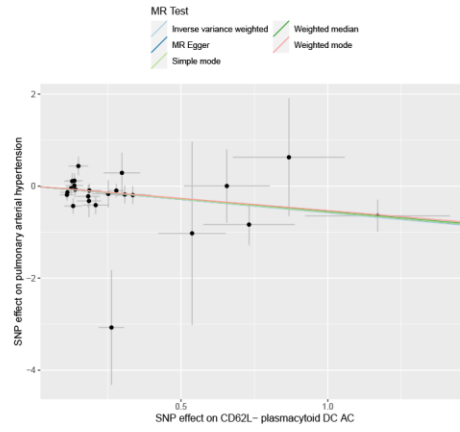**C**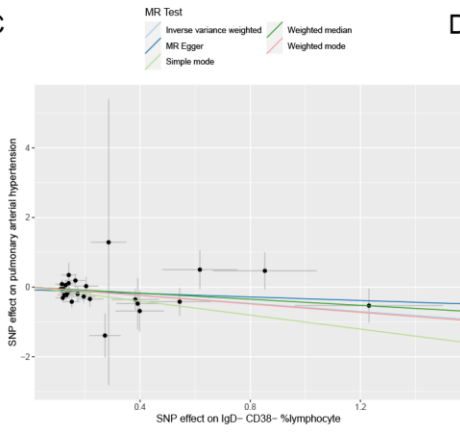**D**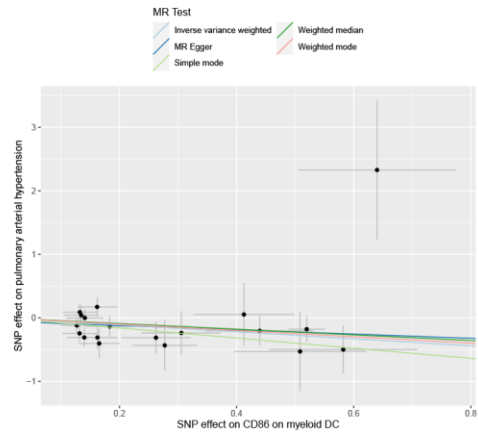

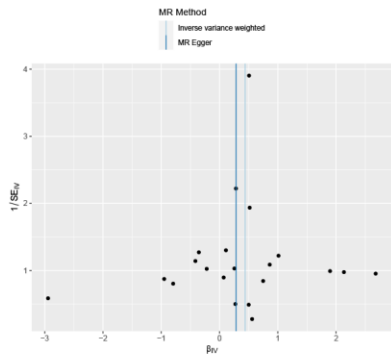

CD4 Treg AC

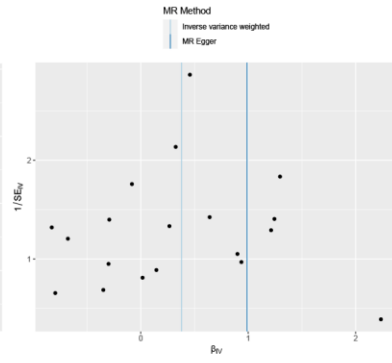

CD11b on basophil

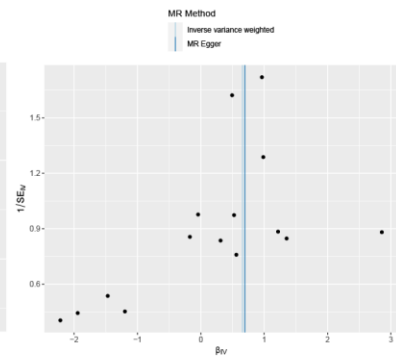

CD20-CD38-AC

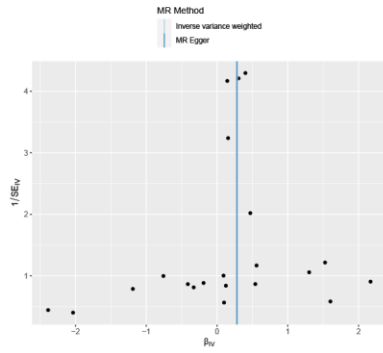

FSC-A on T cell

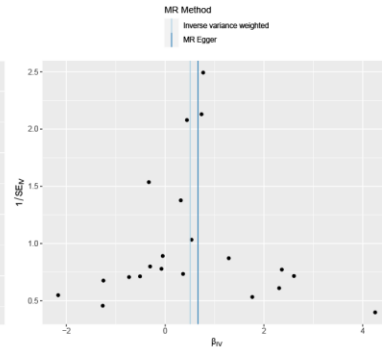

Naive DN(CD4-CD8)%T cell

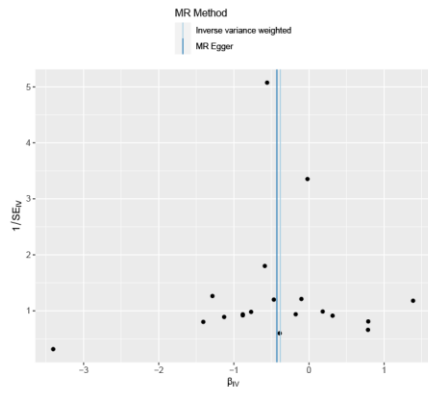

HLA DR on HLA DR+ T cell

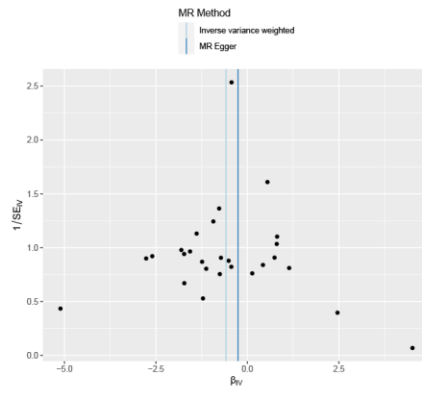

IgD-CD38-%lymphocyte

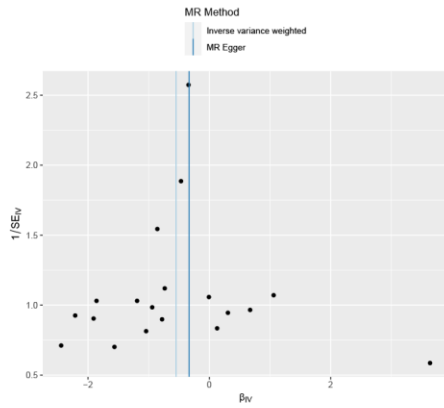

CD86 on myeloid DC

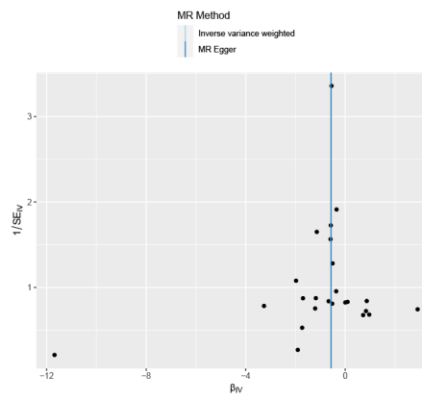

CD62-plasmacytoid DC AC
